# Supplementary material for: Comparative Analysis of Proteomes and Functionomes Provides Insights into Origins of Cellular Diversification
Source: Hindawi journal article supplement (doi:10.1155/2013/648746), 2013-01-01
Supplement: f1 [file 648746.f1.pdf]

## Supplementary Material

TABLE S1: List of FSFs that were likely acquired via HGT in the AB, AE, and BE taxonomic groups. Both the SCOP and alphanumeric identifiers were used to define FSFs. HGT direction was inferred from  $f_{difference}$ , which is the difference in  $f$ -values between  $f_{former}$  (e.g. A in the AB taxonomic group) and  $f_{latter}$  (B in AB).

| Taxonomic group | SCOP Id | FSF Id  | FSF name                                                        | $f_{former}$ | $f_{latter}$ | $f_{difference}$ | HGT direction |
|-----------------|---------|---------|-----------------------------------------------------------------|--------------|--------------|------------------|---------------|
| AB              | 111249  | d.280.1 | Sulfolobus fructose-1,6-bisphosphatase-like                     | 0.7143       | 0.0353       | 0.679            | A to B        |
| AE              | 55267   | d.75.1  | tRNA-intron endonuclease N-terminal domain-like                 | 0.9429       | 0.0154       | 0.9274           | A to E        |
| AE              | 118310  | g.80.1  | AN1-like Zinc finger                                            | 0.3143       | 0.9498       | -0.6355          | E to A        |
| AE              | 47157   | a.23.4  | Mitochondrial import receptor subunit Tom20                     | 0.0143       | 0.7066       | -0.6923          | E to A        |
| AE              | 55418   | d.86.1  | eIF4e-like                                                      | 0.1286       | 1            | -0.8714          | E to A        |
| AE              | 101576  | b.132.1 | Supernatant protein factor (SPF), C-terminal domain             | 0.0143       | 0.8996       | -0.8853          | E to A        |
| AE              | 56741   | e.15.1  | Eukaryotic DNA topoisomerase I, N-terminal DNA-binding fragment | 0.0143       | 0.9498       | -0.9355          | E to A        |
| AE              | 109993  | a.222.1 | VPS9 domain                                                     | 0.0143       | 0.9846       | -0.9703          | E to A        |
| BE              | 69705   | d.202.1 | Transcription factor NusA, N-terminal domain                    | 0.9954       | 0.0039       | 0.9915           | B to E        |
| BE              | 48295   | a.4.12  | TrpR-like                                                       | 0.9831       | 0.0039       | 0.9793           | B to E        |
| BE              | 74982   | b.111.1 | Small protein B (SmpB)                                          | 0.9985       | 0.0347       | 0.9637           | B to E        |
| BE              | 48024   | a.81.1  | N-terminal domain of DnaB helicase                              | 0.9877       | 0.027        | 0.9607           | B to E        |
| BE              | 47789   | a.60.3  | C-terminal domain of RNA polymerase alpha subunit               | 0.9954       | 0.0502       | 0.9452           | B to E        |
| BE              | 46557   | a.2.1   | GreA transcript cleavage protein, N-terminal domain             | 0.9555       | 0.0116       | 0.9439           | B to E        |
| BE              | 111304  | e.49.1  | Recombination protein RecR                                      | 0.9509       | 0.0116       | 0.9393           | B to E        |
| BE              | 56519   | d.175.1 | Penicillin binding protein dimerisation domain                  | 0.9463       | 0.027        | 0.9193           | B to E        |
| BE              | 54752   | d.48.1  | RecA protein, C-terminal domain                                 | 0.9847       | 0.0734       | 0.9113           | B to E        |
| BE              | 82679   | d.58.42 | N-utilization substance G protein NusG, N-terminal              | 0.9954       | 0.0965       | 0.8989           | B to E        |

|    |        |         |                                                                                 |        |        |        |        |
|----|--------|---------|---------------------------------------------------------------------------------|--------|--------|--------|--------|
|    |        |         | domain                                                                          |        |        |        |        |
| BE | 46992  | a.7.6   | Ribosomal protein S20                                                           | 0.9831 | 0.0965 | 0.8866 | B to E |
| BE | 143517 | d.315.1 | TRCF domain-like                                                                | 0.9325 | 0.0618 | 0.8707 | B to E |
| BE | 102735 | d.241.2 | Trigger factor ribosome-binding domain                                          | 0.9862 | 0.1158 | 0.8704 | B to E |
| BE | 63418  | c.98.1  | MurE/MurF N-terminal domain                                                     | 0.9371 | 0.0734 | 0.8638 | B to E |
| BE | 141259 | b.34.18 | CarD-like                                                                       | 0.9371 | 0.0734 | 0.8638 | B to E |
| BE | 88946  | a.177.1 | Sigma2 domain of RNA polymerase sigma factors                                   | 0.9985 | 0.1429 | 0.8556 | B to E |
| BE | 81886  | a.172.1 | Helical scaffold and wing domains of SecA                                       | 0.9939 | 0.139  | 0.8549 | B to E |
| BE | 75420  | d.52.4  | YhbC-like, N-terminal domain                                                    | 0.8834 | 0.0347 | 0.8487 | B to E |
| BE | 55653  | d.99.1  | Ribosomal protein L9 C-domain                                                   | 0.9939 | 0.1506 | 0.8433 | B to E |
| BE | 81767  | a.162.1 | Pre-protein crosslinking domain of SecA                                         | 0.9939 | 0.1506 | 0.8433 | B to E |
| BE | 109998 | a.223.1 | Triger factor/SurA peptide-binding domain-like                                  | 0.9954 | 0.166  | 0.8294 | B to E |
| BE | 82607  | d.222.1 | YbaB-like                                                                       | 0.9126 | 0.1274 | 0.7852 | B to E |
| BE | 68912  | a.140.3 | Rho N-terminal domain-like                                                      | 0.8436 | 0.0618 | 0.7818 | B to E |
| BE | 103088 | d.79.7  | OmpA-like                                                                       | 0.7945 | 0.0425 | 0.752  | B to E |
| BE | 74942  | b.38.2  | YhbC-like, C-terminal domain                                                    | 0.7515 | 0.0116 | 0.74   | B to E |
| BE | 141523 | b.160.1 | L,D-transpeptidase catalytic domain-like                                        | 0.7362 | 0.0154 | 0.7208 | B to E |
| BE | 82693  | d.58.44 | Multidrug efflux transporter AcrB pore domain; PN1, PN2, PC1 and PC2 subdomains | 0.7454 | 0.0463 | 0.6991 | B to E |
| BE | 82714  | d.225.1 | Multidrug efflux transporter AcrB TolC docking domain; DN and DC subdomains     | 0.7285 | 0.0463 | 0.6822 | B to E |
| BE | 111369 | f.46.1  | HlyD-like secretion proteins                                                    | 0.7163 | 0.0386 | 0.6776 | B to E |
| BE | 109635 | a.2.14  | DnaK suppressor protein DksA, alpha-hairpin domain                              | 0.681  | 0.0039 | 0.6771 | B to E |
| BE | 54523  | d.24.1  | Pili subunits                                                                   | 0.6794 | 0.0232 | 0.6563 | B to E |
| BE | 69765  | d.79.5  | IpsF-like                                                                       | 0.8282 | 0.1815 | 0.6468 | B to E |
| BE | 141868 | c.1.33  | EAL domain-like                                                                 | 0.6764 | 0.0347 | 0.6416 | B to E |
| BE | 69055  | a.69.3  | 1-deoxy-D-                                                                      | 0.8037 | 0.1699 | 0.6338 | B to E |

|    |        |         |                                                                                                          |        |        |         |        |
|----|--------|---------|----------------------------------------------------------------------------------------------------------|--------|--------|---------|--------|
|    |        |         | xylulose-5-phosphate reductoisomerase, C-terminal domain                                                 |        |        |         |        |
| BE | 110399 | c.1.31  | ThiG-like                                                                                                | 0.6856 | 0.0656 | 0.6199  | B to E |
| BE | 55895  | d.124.1 | Ribonuclease Rh-like                                                                                     | 0.1871 | 0.7992 | -0.6121 | E to B |
| BE | 55387  | d.82.2  | Frataxin/Nqo15-like                                                                                      | 0.2408 | 0.8533 | -0.6125 | E to B |
| BE | 142921 | d.297.1 | WGR domain-like                                                                                          | 0.0767 | 0.6988 | -0.6222 | E to B |
| BE | 140959 | a.266.1 | Indolic compounds 2,3-dioxygenase-like                                                                   | 0.1933 | 0.8185 | -0.6253 | E to B |
| BE | 48056  | a.86.1  | Di-copper centre-containing domain                                                                       | 0.0552 | 0.6911 | -0.6359 | E to B |
| BE | 69848  | d.209.1 | LCCL domain                                                                                              | 0.0046 | 0.6448 | -0.6402 | E to B |
| BE | 57552  | g.20.1  | Blood coagulation inhibitor (disintegrin)                                                                | 0.0031 | 0.668  | -0.6649 | E to B |
| BE | 55724  | d.107.1 | Mog1p/PsbP-like                                                                                          | 0.089  | 0.7568 | -0.6678 | E to B |
| BE | 110836 | d.267.1 | Hypothetical protein SAV1430                                                                             | 0.2209 | 0.8919 | -0.671  | E to B |
| BE | 63862  | b.82.6  | Thiamin pyrophosphokinase, substrate-binding domain                                                      | 0.1779 | 0.8571 | -0.6792 | E to B |
| BE | 50405  | b.42.5  | Actin-crosslinking proteins                                                                              | 0.0552 | 0.7375 | -0.6822 | E to B |
| BE | 55550  | d.93.1  | SH2 domain                                                                                               | 0.0015 | 0.6873 | -0.6857 | E to B |
| BE | 47672  | a.48.2  | Transferrin receptor-like dimerisation domain                                                            | 0.0184 | 0.7104 | -0.692  | E to B |
| BE | 47874  | a.65.1  | Annexin                                                                                                  | 0.0046 | 0.7027 | -0.6981 | E to B |
| BE | 109885 | a.216.1 | I/LWEQ domain                                                                                            | 0.0015 | 0.722  | -0.7205 | E to B |
| BE | 49354  | b.1.11  | PapD-like                                                                                                | 0.2132 | 0.9537 | -0.7405 | E to B |
| BE | 48366  | a.117.1 | Ras GEF                                                                                                  | 0.0046 | 0.8031 | -0.7985 | E to B |
| BE | 81496  | f.23.11 | Cytochrome c1 subunit of cytochrome bc1 complex (Ubiquinol-cytochrome c reductase), transmembrane anchor | 0.0276 | 0.8263 | -0.7986 | E to B |
| BE | 48065  | a.87.1  | DBL homology domain (DH-domain)                                                                          | 0.0015 | 0.8069 | -0.8054 | E to B |
| BE | 54447  | d.18.1  | ssDNA-binding transcriptional regulator domain                                                           | 0.0307 | 0.8571 | -0.8265 | E to B |
| BE | 63491  | a.7.7   | BAG domain                                                                                               | 0.0015 | 0.8571 | -0.8556 | E to B |
| BE | 47027  | a.11.1  | Acyl-CoA binding protein                                                                                 | 0.0859 | 0.9653 | -0.8794 | E to B |
| BE | 47592  | a.42.1  | SWIB/MDM2                                                                                                | 0.0644 | 0.9498 | -0.8854 | E to B |

|    |        |              |                                                |        |        |         |        |
|----|--------|--------------|------------------------------------------------|--------|--------|---------|--------|
|    |        |              | domain                                         |        |        |         |        |
| BE | 47762  | a.59.1       | PAH2 domain                                    | 0.0015 | 0.888  | -0.8865 | E to B |
| BE | 48225  | a.102.2      | Seven-hairpin glycosidases                     | 0.0092 | 0.9073 | -0.8981 | E to B |
| BE | 53036  | c.52.3       | Eukaryotic RPB5 N-terminal domain              | 0.0031 | 0.9189 | -0.9159 | E to B |
| BE | 55277  | d.76.1       | GYF domain                                     | 0.0138 | 0.9498 | -0.936  | E to B |
| BE | 55637  | d.97.1       | Cell cycle regulatory proteins                 | 0.0015 | 0.9382 | -0.9367 | E to B |
| BE | 90209  | g.41.11      | Ran binding protein zinc finger-like           | 0.0015 | 0.9382 | -0.9367 | E to B |
| BE | 117289 | b.69.14      | Nucleoporin domain                             | 0.0215 | 0.9691 | -0.9476 | E to B |
| BE | 81383  | a.158.1      | F-box domain                                   | 0.0092 | 0.9614 | -0.9522 | E to B |
| BE | 69000  | a.24.15      | FAD-dependent thiol oxidase                    | 0.0015 | 0.9575 | -0.956  | E to B |
| BE | 82109  | b.42.6       | MIR domain                                     | 0.0031 | 0.9614 | -0.9583 | E to B |
| BE | 63748  | b.34.9       | Tudor/PWWP/MBT                                 | 0.0061 | 0.9653 | -0.9591 | E to B |
| BE | 74924  | b.34.10      | Cap-Gly domain                                 | 0.0015 | 0.9653 | -0.9637 | E to B |
|    |        |              | The spindle assembly checkpoint protein mad2   |        |        |         |        |
| BE | 56019  | d.135.1      | assembly checkpoint protein mad2               | 0.0077 | 0.973  | -0.9653 | E to B |
| BE | 47769  | a.60.1       | SAM/Pointed domain                             | 0.0092 | 0.9768 | -0.9676 | E to B |
| BE | 48350  | a.116.1      | GTPase activation domain, GAP                  | 0.0046 | 0.9846 | -0.98   | E to B |
| BE | 57850  | g.44.1       | RING/U-box                                     | 0.0199 | 1      | -0.9801 | E to B |
| BE | 101447 | a.207.1      | Formin homology 2 domain (FH2 domain)          | 0.0061 | 0.9884 | -0.9823 | E to B |
| BE | 54236  | d.15.1       | Ubiquitin-like                                 | 0.0138 | 0.9961 | -0.9823 | E to B |
| BE | 48425  | a.118.3      | Sec7 domain                                    | 0.0107 | 0.9961 | -0.9854 | E to B |
| BE | 54695  | d.42.1       | POZ domain                                     | 0.0015 | 0.9884 | -0.9869 | E to B |
| BE | 48464  | a.118.9      | ENTH/VHS domain                                | 0.0015 | 0.9884 | -0.9869 | E to B |
| BE | 49348  | b.1.10       | Clathrin adaptor appendage domain              | 0.0046 | 0.9923 | -0.9877 | E to B |
| BE | 54495  | d.20.1       | UBC-like                                       | 0.0107 | 1      | -0.9893 | E to B |
|    |        |              | C2 domain (Calcium/lipid-binding domain, CaLB) |        |        |         |        |
| BE | 49562  | b.7.1        | C2 domain (Calcium/lipid-binding domain, CaLB) | 0.0061 | 0.9961 | -0.99   | E to B |
| BE | 81995  | b.2.8        | beta-sandwich domain of Sec23/24               | 0.0015 | 0.9923 | -0.9907 | E to B |
| BE | 82919  | g.41.10      | Zn-finger domain of Sec23/24                   | 0.0015 | 0.9923 | -0.9907 | E to B |
| BE | 74788  | a.118.1<br>7 | Cullin repeat-like                             | 0.0015 | 0.9923 | -0.9907 | E to B |
| BE | 47661  | a.47.2       | t-snare proteins                               | 0.0015 | 0.9961 | -0.9946 | E to B |
| BE | 50729  | b.55.1       | PH domain-like                                 | 0.0015 | 0.9961 | -0.9946 | E to B |

TABLE S2: List of GOs that were likely acquired via HGT in the AB, AE, and BE taxonomic groups. HGT direction was inferred from  $f_{difference}$ , which is the difference in  $f$ -values between  $f_{former}$  (e.g. A in the AB taxonomic group) and  $f_{latter}$  (B in AB).

| <b>Taxonomic group</b> | <b>GO Id</b> | <b>GO name</b>                                                      | $f_{former}$ | $f_{latter}$ | $f_{difference}$ | <b>HGT direction</b> |
|------------------------|--------------|---------------------------------------------------------------------|--------------|--------------|------------------|----------------------|
| AB                     | GO:0009381   | excinuclease ABC activity                                           | 0.3778       | 1            | -0.6222          | B to A               |
| AB                     | GO:0008855   | exodeoxyribonuclease VII activity                                   | 0.2444       | 0.9235       | -0.6791          | B to A               |
| AB                     | GO:0019134   | glucosamine-1-phosphate N-acetyltransferase activity                | 0.1556       | 0.8634       | -0.7078          | B to A               |
| AB                     | GO:0008965   | phosphoenolpyruvate-protein phosphotransferase activity             | 0.0444       | 0.765        | -0.7206          | B to A               |
| AB                     | GO:0008760   | UDP-N-acetylglucosamine 1-carboxyvinyltransferase activity          | 0.0222       | 0.8306       | -0.8084          | B to A               |
| AB                     | GO:0008881   | glutamate racemase activity                                         | 0.0222       | 0.8852       | -0.863           | B to A               |
| AB                     | GO:0008658   | penicillin binding                                                  | 0.1111       | 1            | -0.8889          | B to A               |
| AB                     | GO:0008784   | alanine racemase activity                                           | 0.0444       | 0.9836       | -0.9392          | B to A               |
| AB                     | GO:0008763   | UDP-N-acetylmuramate-L-alanine ligase activity                      | 0.0222       | 0.9945       | -0.9723          | B to A               |
| AE                     | GO:0004579   | dolichyl-diphosphooligosaccharide-protein glycotransferase activity | 0.1111       | 1            | -0.8889          | E to A               |
| BE                     | GO:0008685   | 2-C-methyl-D-erythritol 2,4-cyclodiphosphate synthase activity      | 0.9071       | 0.0952       | 0.8119           | B to E               |
| BE                     | GO:0030604   | 1-deoxy-D-xylulose-5-phosphate reductoisomerase activity            | 0.9016       | 0.0952       | 0.8064           | B to E               |
| BE                     | GO:0003688   | DNA replication origin binding                                      | 1            | 0.2857       | 0.7143           | B to E               |
| BE                     | GO:0003919   | FMN adenylyltransferase activity                                    | 1            | 0.3333       | 0.6667           | B to E               |
| BE                     | GO:0004115   | 3',5'-cyclic-AMP phosphodiesterase activity                         | 0.0984       | 0.7143       | -0.6159          | E to B               |
| BE                     | GO:0018738   | S-formylglutathione hydrolase activity                              | 0.3333       | 0.9524       | -0.619           | E to B               |
| BE                     | GO:0031418   | L-ascorbic acid binding                                             | 0.3716       | 1            | -0.6284          | E to B               |
| BE                     | GO:0004652   | polynucleotide adenylyltransferase activity                         | 0.3169       | 0.9524       | -0.6354          | E to B               |
| BE                     | GO:0004502   | kynurenine 3-monooxygenase activity                                 | 0.0219       | 0.6667       | -0.6448          | E to B               |
| BE                     | GO:0004037   | allantoicase activity                                               | 0.0656       | 0.7143       | -0.6487          | E to B               |
| BE                     | GO:0004768   | stearoyl-CoA 9-desaturase activity                                  | 0.1038       | 0.7619       | -0.6581          | E to B               |
| BE                     | GO:0008603   | cAMP-dependent protein kinase regulator activity                    | 0.2295       | 0.9524       | -0.7229          | E to B               |
| BE                     | GO:0004392   | heme oxygenase (decyclizing) activity                               | 0.1803       | 0.9048       | -0.7244          | E to B               |
| BE                     | GO:0003870   | 5-aminolevulinatase synthase                                        | 0.1639       | 0.9048       | -0.7408          | E to B               |

|    |            |                                                               |        |        |         |        |
|----|------------|---------------------------------------------------------------|--------|--------|---------|--------|
|    |            | activity                                                      |        |        |         |        |
| BE | GO:0005544 | calcium-dependent<br>phospholipid binding                     | 0.0164 | 0.7619 | -0.7455 | E to B |
| BE | GO:0008478 | pyridoxal kinase activity                                     | 0.153  | 0.9048 | -0.7518 | E to B |
| BE | GO:0008441 | 3'(2'),5'-bisphosphate<br>nucleotidase activity               | 0.1038 | 0.8571 | -0.7533 | E to B |
| BE | GO:0004622 | lysophospholipase activity                                    | 0.1311 | 0.9048 | -0.7736 | E to B |
| BE | GO:0005516 | calmodulin binding                                            | 0.0546 | 0.8571 | -0.8025 | E to B |
| BE | GO:0000062 | fatty-acyl-CoA binding                                        | 0.1913 | 1      | -0.8087 | E to B |
| BE | GO:0004499 | N,N-dimethylaniline<br>monooxygenase activity                 | 0.1803 | 1      | -0.8197 | E to B |
| BE | GO:0004408 | holocytochrome-c synthase<br>activity                         | 0.0273 | 0.8571 | -0.8298 | E to B |
| BE | GO:0004198 | calcium-dependent<br>cysteine-type<br>endopeptidase activity  | 0.0164 | 0.9524 | -0.936  | E to B |
| BE | GO:0008083 | growth factor activity                                        | 0.0055 | 0.9524 | -0.9469 | E to B |
| BE | GO:0004610 | phosphoacetylglucosamine<br>mutase activity                   | 0.0055 | 0.9524 | -0.9469 | E to B |
| BE | GO:0004001 | adenosine kinase activity                                     | 0.0328 | 1      | -0.9672 | E to B |
| BE | GO:0004435 | phosphatidylinositol<br>phospholipase C activity              | 0.0273 | 1      | -0.9727 | E to B |
| BE | GO:0004571 | mannosyl-oligosaccharide<br>1,2-alpha-mannosidase<br>activity | 0.0109 | 1      | -0.9891 | E to B |
| BE | GO:0004835 | tubulin-tyrosine ligase<br>activity                           | 0.0109 | 1      | -0.9891 | E to B |
| BE | GO:0003873 | 6-phosphofructo-2-kinase<br>activity                          | 0.0109 | 1      | -0.9891 | E to B |
| BE | GO:0005484 | SNAP receptor activity                                        | 0.0055 | 1      | -0.9945 | E to B |
| BE | GO:0004012 | phospholipid-translocating<br>ATPase activity                 | 0.0055 | 1      | -0.9945 | E to B |

---

TABLE S3: List of FSFs that were uniquely detected in the proteomes of the AE taxonomic group.

| No. | Scop Id | FSF Id  | FSF description                                                              |
|-----|---------|---------|------------------------------------------------------------------------------|
| 1   | 48140   | a.94.1  | Ribosomal protein L19 (L19e)                                                 |
| 2   | 109993  | a.222.1 | VPS9 domain                                                                  |
| 3   | 53032   | c.52.2  | tRNA-intron endonuclease catalytic domain-like                               |
| 4   | 54984   | d.58.12 | eEF-1beta-like                                                               |
| 5   | 116742  | a.60.14 | eIF2alpha middle domain-like                                                 |
| 6   | 118310  | g.80.1  | AN1-like Zinc finger                                                         |
| 7   | 54575   | d.29.1  | Ribosomal protein L31e                                                       |
| 8   | 55481   | d.91.1  | N-terminal domain of eukaryotic peptide chain release factor subunit 1, ERF1 |
| 9   | 89124   | a.183.1 | Nop domain                                                                   |
| 10  | 55003   | d.58.16 | PAP/Archaeal CCA-adding enzyme, C-terminal domain                            |
| 11  | 55267   | d.75.1  | tRNA-intron endonuclease N-terminal domain-like                              |
| 12  | 110993  | d.58.51 | eIF-2-alpha, C-terminal domain                                               |
| 13  | 69695   | d.201.1 | SRP19                                                                        |
| 14  | 82704   | d.68.6  | AlbA-like                                                                    |
| 15  | 48662   | a.137.1 | Ribosomal protein L39e                                                       |
| 16  | 56741   | e.15.1  | Eukaryotic DNA topoisomerase I, N-terminal DNA-binding fragment              |
| 17  | 46950   | a.5.6   | Double-stranded DNA-binding domain                                           |
| 18  | 116820  | a.4.15  | Rps17e-like                                                                  |
| 19  | 75689   | g.59.1  | Zinc-binding domain of translation initiation factor 2 beta                  |
| 20  | 143870  | d.329.1 | PF0523-like                                                                  |
| 21  | 88798   | d.230.1 | N-terminal, heterodimerisation domain of RBP7 (RpoE)                         |
| 22  | 140726  | a.253.1 | AF0941-like                                                                  |
| 23  | 89895   | d.235.1 | FYSH domain                                                                  |
| 24  | 144210  | g.41.16 | Nop10-like SnoRNP                                                            |
| 25  | 47157   | a.23.4  | Mitochondrial import receptor subunit Tom20                                  |
| 26  | 52042   | c.9.2   | Ribosomal protein L32e                                                       |
| 27  | 111278  | d.282.1 | SSo0622-like                                                                 |
| 28  | 75399   | d.211.2 | Plakin repeat                                                                |
| 29  | 103456  | f.23.28 | Preprotein translocase SecE subunit                                          |
| 30  | 63393   | g.41.9  | RNA polymerase subunits                                                      |
| 31  | 55418   | d.86.1  | eIF4e-like                                                                   |
| 32  | 101576  | b.132.1 | Supernatant protein factor (SPF), C-terminal domain                          |
| 33  | 141562  | b.162.1 | At5g01610-like                                                               |
| 34  | 55287   | d.78.1  | RPB5-like RNA polymerase subunit                                             |
| 35  | 46924   | a.4.11  | RNA polymerase subunit RPB10                                                 |
| 36  | 109728  | a.5.8   | Hypothetical protein AF0491, middle domain                                   |
| 37  | 100966  | d.241.1 | Translation initiation factor 2 beta, aIF2beta, N-terminal domain            |
| 38  | 88802   | d.17.6  | Pre-PUA domain                                                               |

TABLE S4: List of terminal GOs that were uniquely detected in the functionomes of the AE taxonomic group.

| No. | GO Id      | GO description                                                                            |
|-----|------------|-------------------------------------------------------------------------------------------|
| 1   | GO:0000213 | tRNA-intron endonuclease activity                                                         |
| 2   | GO:0004579 | dolichyl-diphosphooligosaccharide-protein glycotransferase activity                       |
| 3   | GO:0004965 | G-protein coupled GABA receptor activity                                                  |
| 4   | GO:0004164 | diphthine synthase activity                                                               |
| 5   | GO:0030337 | DNA polymerase processivity factor activity                                               |
| 6   | GO:0017091 | AU-rich element binding                                                                   |
| 7   | GO:0030410 | nicotianamine synthase activity                                                           |
| 8   | GO:0004776 | succinate-CoA ligase (GDP-forming) activity                                               |
| 9   | GO:0008466 | glycogenin glucosyltransferase activity                                                   |
| 10  | GO:0003975 | UDP-N-acetylglucosamine-dolichyl-phosphate N-acetylglucosaminephosphotransferase activity |
| 11  | GO:0004581 | dolichyl-phosphate beta-glucosyltransferase activity                                      |



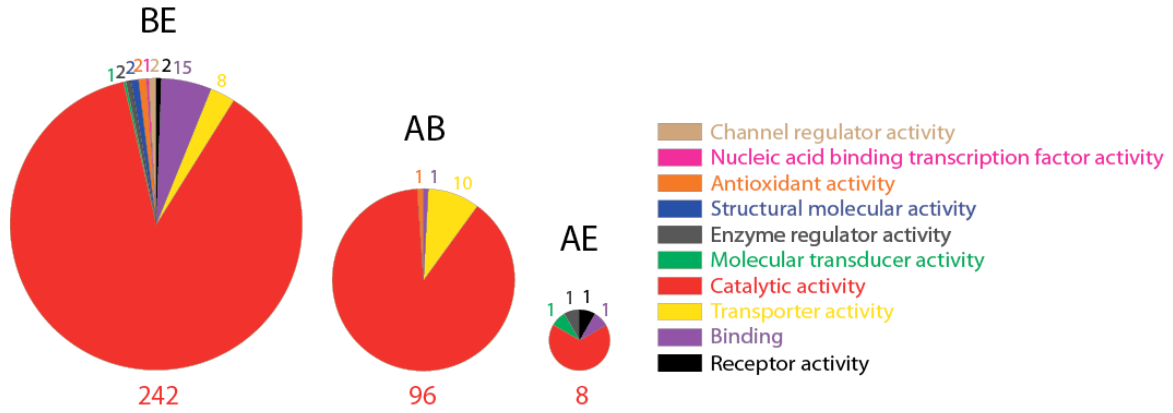

FIGURE S1: Pie charts displaying the distribution of terminal GOs in level-1 parent terms. Numbers indicate total number of terminal GOs annotated to each parent term category. Terms may be mapped to more than one parent.
